# Supplementary material for: Detection of second-line drug resistance in Mycobacterium tuberculosis using oligonucleotide microarrays
Source: PubMed Central journal article supplement (PMC3671172; doi:10.1186/1471-2334-13-240), 2013-05-24
Supplement: 1471-2334-13-240-S3.pdf [file 1471-2334-13-240-S3.pdf]

**Table S3 - Primers used for the amplification of the *gyrA*, *gyrB*, *rrs* and *eis* fragments.**

| Primer             | Sequence 5' to 3'                              | Length |
|--------------------|------------------------------------------------|--------|
| <i>gyrA</i> -F     | ctctgcgagcataatg-ggaggtgcgcgacgggctcaagc       | 39     |
| <i>gyrA</i> -R     | ggctgtacgctgtc-ccagcgggtagcgagcgacca           | 36     |
| <i>gyrB</i> -F     | ctctgcgagcataatg-caaggctgtgtcctcggcgcaagcc     | 41     |
| <i>gyrB</i> -R     | ggctgtacgctgtc-cggtgccagcgccgtgatgat           | 36     |
| <i>rrs</i> -F      | ctctgcgagcataatg-tctcagttcggatcggggtctgcaactcg | 45     |
| <i>rrs</i> -R      | ggctgtacgctgtc-ccagttggggcgtttctgtggtgctcc     | 41     |
| <i>eis</i> -F      | ctctgcgagcataatg-gcgaaattcgtcgtgatttctcgagtggc | 46     |
| <i>eis</i> -R      | ggctgtacgctgtc-cccggccagtcgtcctcggtcg          | 36     |
| uni-F              | ctctgcgagcataatg                               | 16     |
| uni-R              | ggctgtacgctgtc                                 | 14     |
| <i>gyrA</i> -F-seq | gtgcgcgacgggctcaagc                            | 19     |
| <i>gyrA</i> -R-seq | catcgccaacggggtcagcc                           | 20     |
| <i>gyrB</i> -F-seq | caaggctgtgtcctcggcgca                          | 21     |
| <i>gyrB</i> -R-seq | cacttgagttgtacagcggcggttg                      | 26     |
| <i>rrs</i> -F-seq  | tctcagttcggatcggggtctg                         | 22     |
| <i>rrs</i> -R-seq  | gctctcgcccactacagacaagaa                       | 24     |
| <i>eis</i> -F-seq  | gaaattcgtcgtgatttctcgagtggc                    | 28     |
| <i>eis</i> -R-seq  | gccgcgccagtaggaacatc                           | 21     |

The universal parts of primers are separated by hyphens
